# Supplementary material for: Discovery of a urea-based hit compound as a novel inhibitor of transforming growth factor-β type 1 receptor: in silico and in vitro studies
Source: Royal Society of Chemistry journal article supplement (doi:10.1039/d4cp02480j), 2024-01-01
Supplement: d4cp02480j1.pdf [file d4cp02480j1.pdf]

Supplementary Materials for:

**Discovery of urea-based hit compound as novel inhibitor of transforming growth factor- $\beta$  type 1 receptor: *In silico* and *in vitro* studies**

Yaxin Li <sup>a, b</sup>, Sisi Liu <sup>b</sup>, Zhuoya Wang <sup>c</sup>, Xiaoli Wang <sup>a</sup>, Jiamin Xu <sup>a</sup>, Keke Yao <sup>a</sup>, Ranran Zhang <sup>b</sup>,  
Chenxuan Lu <sup>b</sup>, Zhigang Wu <sup>b</sup>, and Liming Hu <sup>a, \*</sup>

<sup>a</sup> *Beijing Key Laboratory of Environmental and Oncology, College of Chemistry and Life Science, Beijing University of Technology, Beijing 100124, China*

<sup>b</sup> *Hebei Key Laboratory of Neuropharmacology, School of Pharmacy, Hebei North University, Zhangjiakou 075000, China;*

<sup>c</sup> *Qingdao Marine Science and Technology Center, Qingdao 266237, China*

\* Corresponding author. Prof. Hu, E-mail address: huliming@bjut.edu.cn;

**Contents**

1. Figure S1-S10.
2. Table S1.

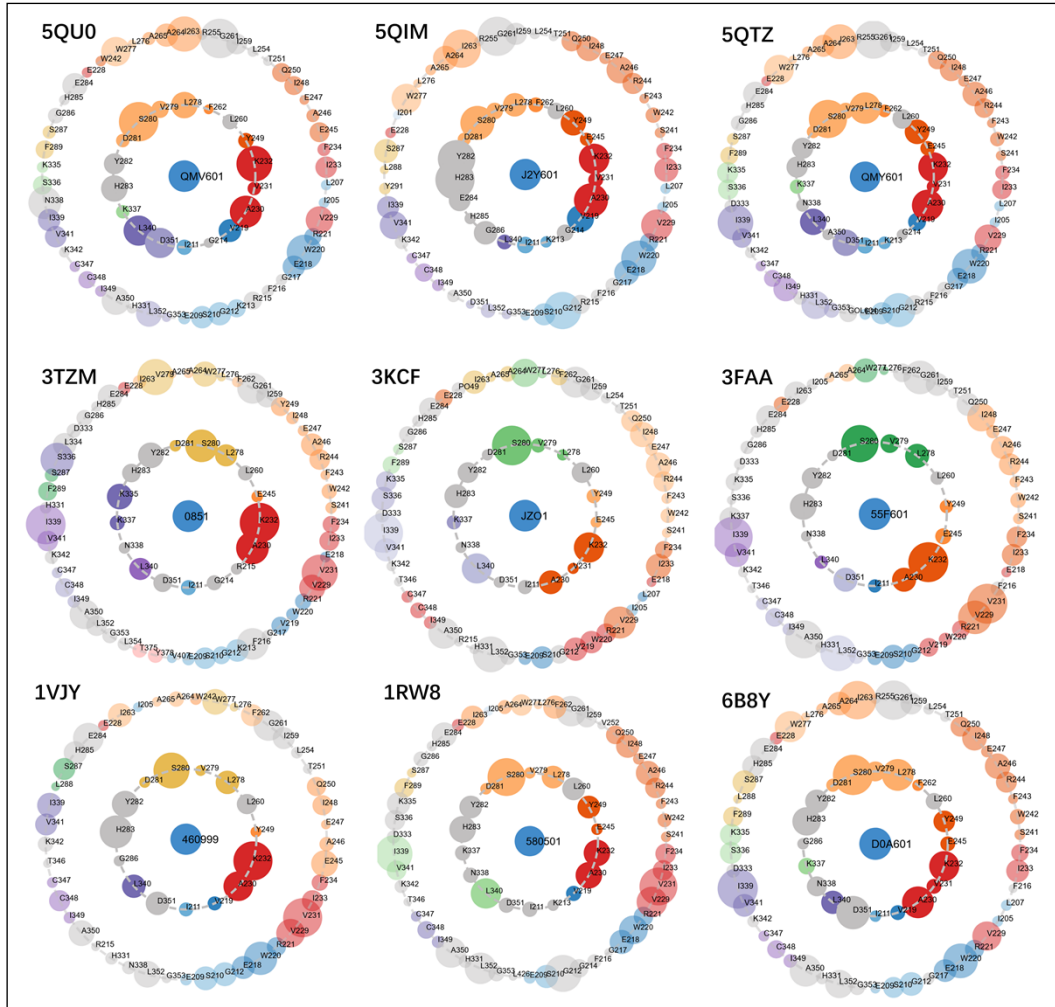

Figure S1. The results of the protein-ligand contact atlas and key residues interacting with the ligands in the crystal structures (S280, Y282, H283, A230, and K232).

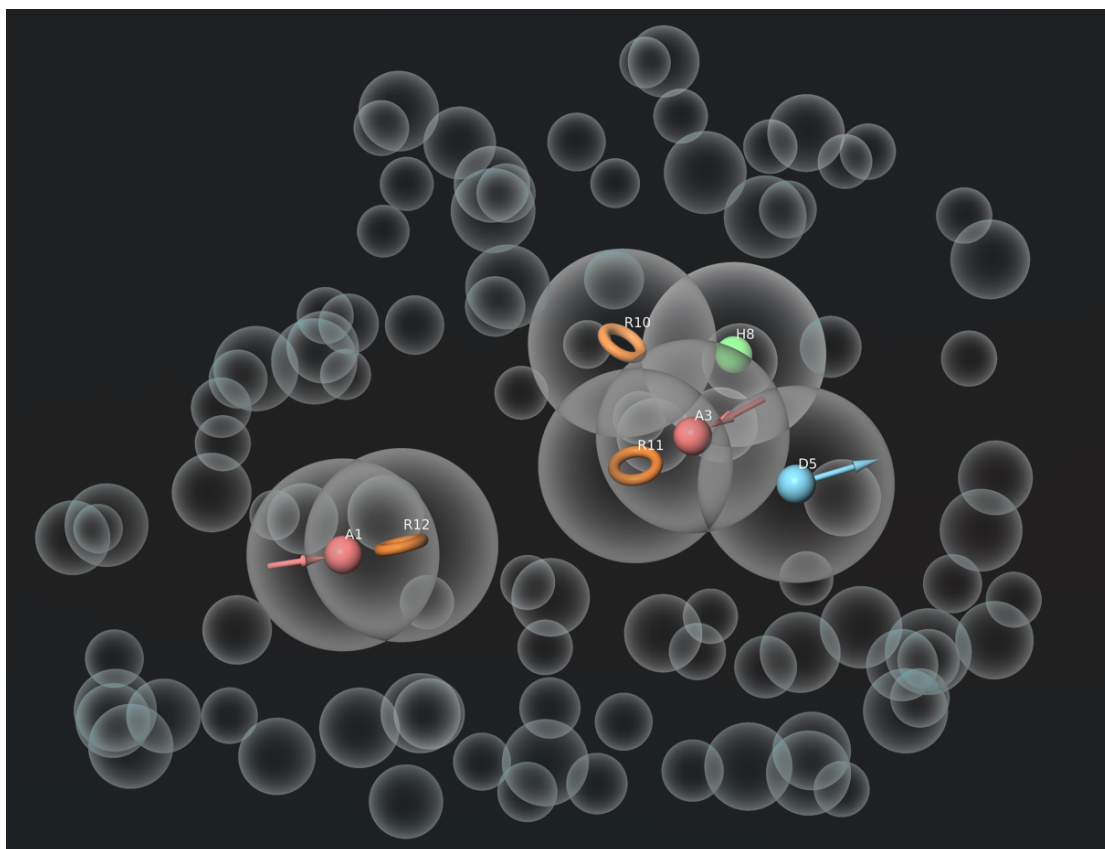

Figure S2. The common key pharmacophore features selected for virtual screening. The outer hollow blob indicates the excluded volume. A, D denote hydrogen bond acceptor and donor, respectively. R denotes an aromatic ring and H denotes a hydrophobic group.

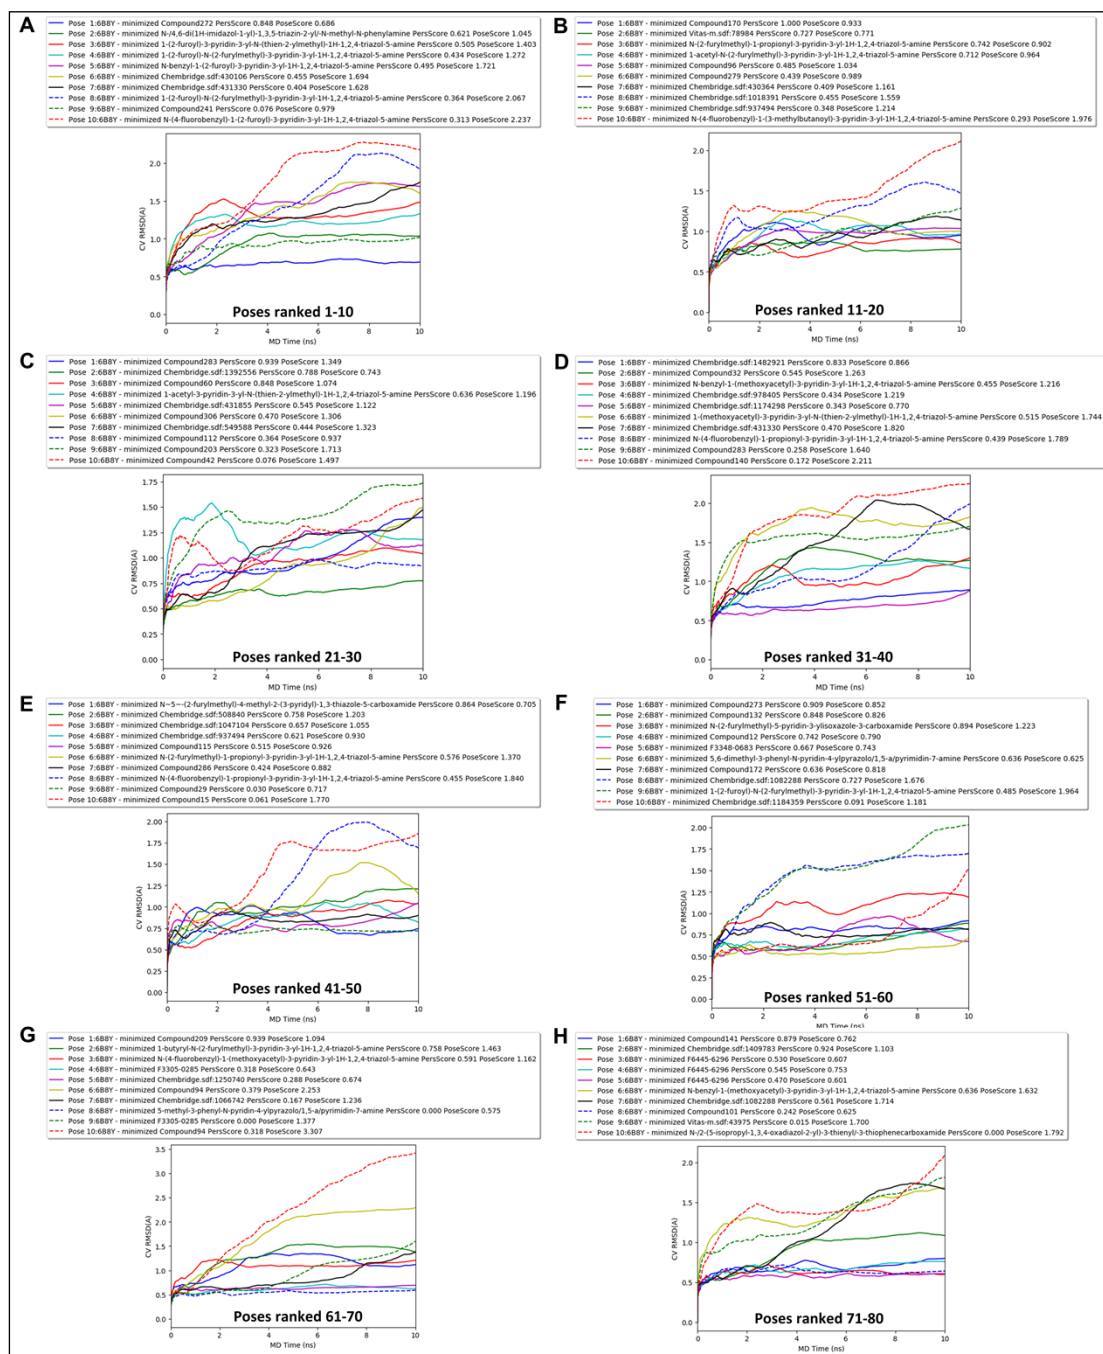

Figure S3. Average RMSD of ligands during the  $10 \times 10$  ns binding pose metadynamics runs in TGF $\beta$ R1 complexes.

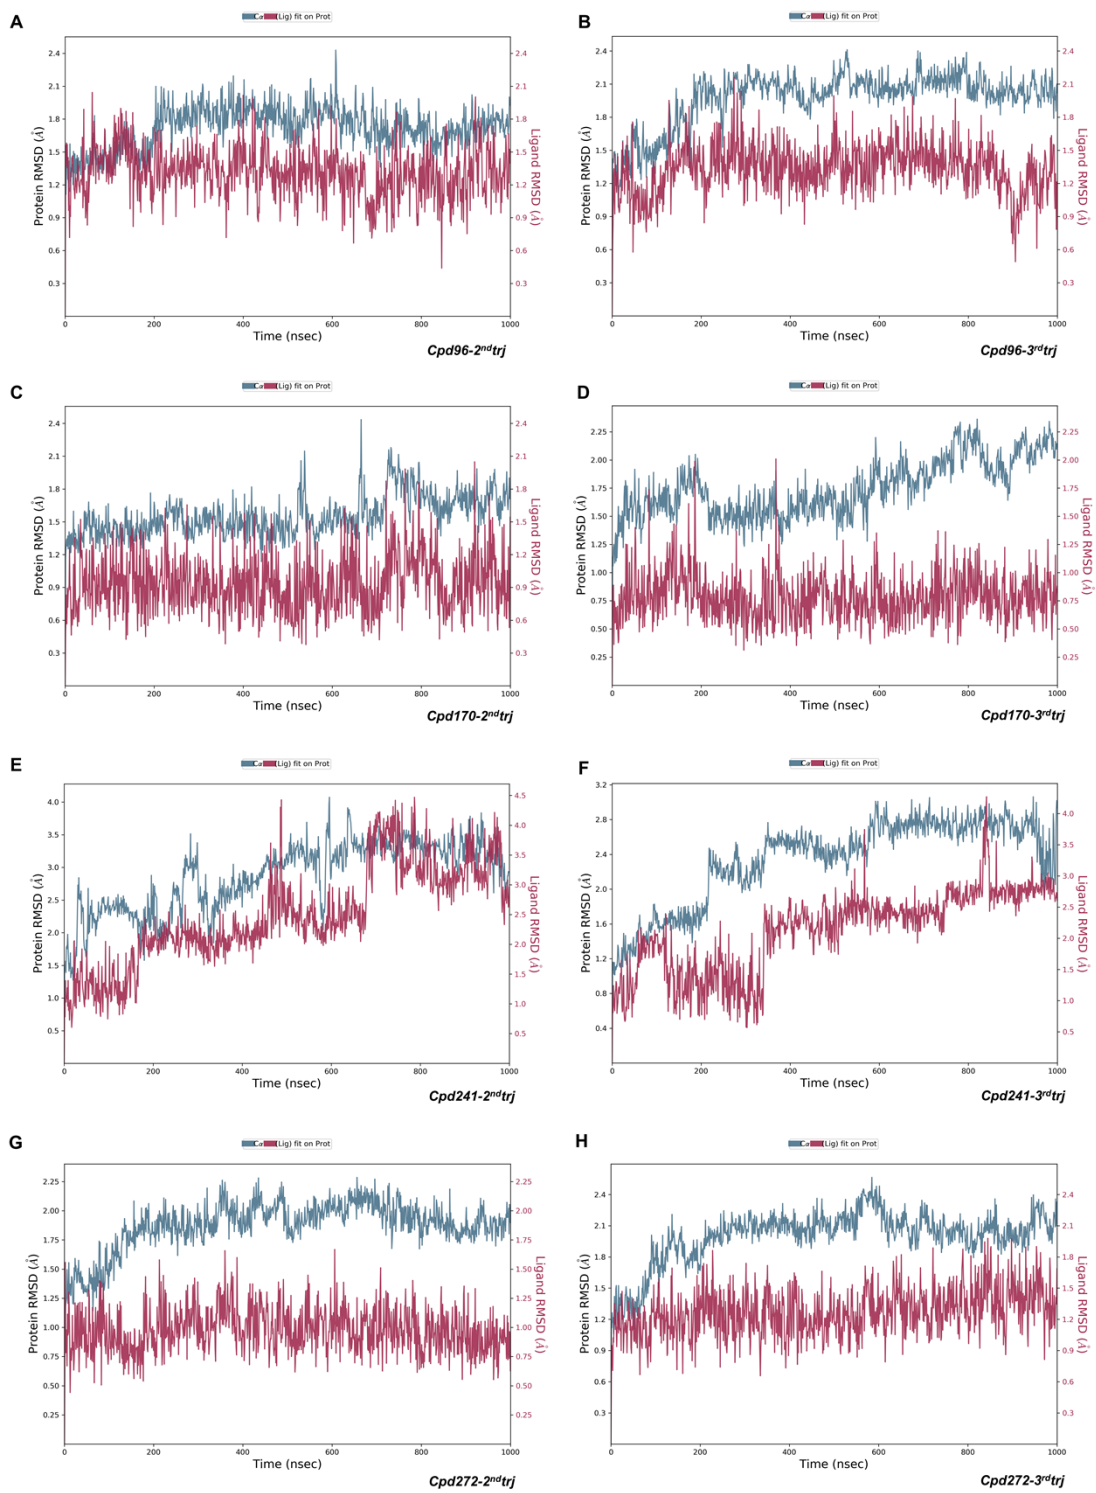

Figure S4. The RMSD values of the 'ligand-fit-protein' and  $\text{C}\alpha$  atoms of proteins monitored throughout the latter two replicates of the MD simulations.

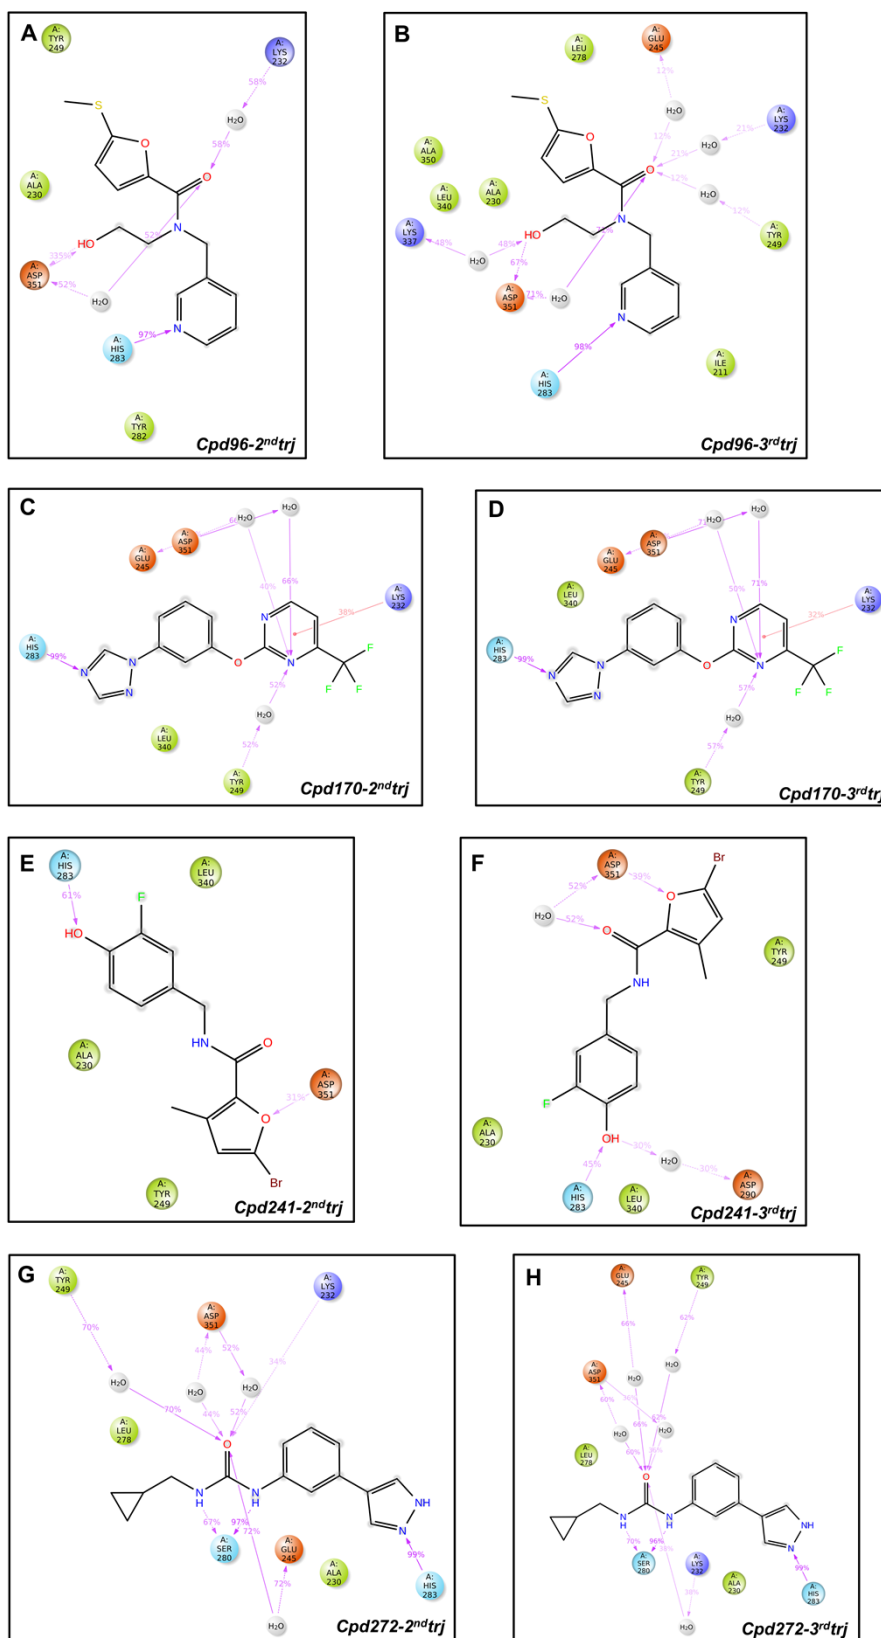

Figure S5. Non-covalent interactions between the protein and ligand monitored throughout the MD simulations. Purple arrows indicate hydrogen bonds, with the atom being pointed at serving as the hydrogen bond acceptor.

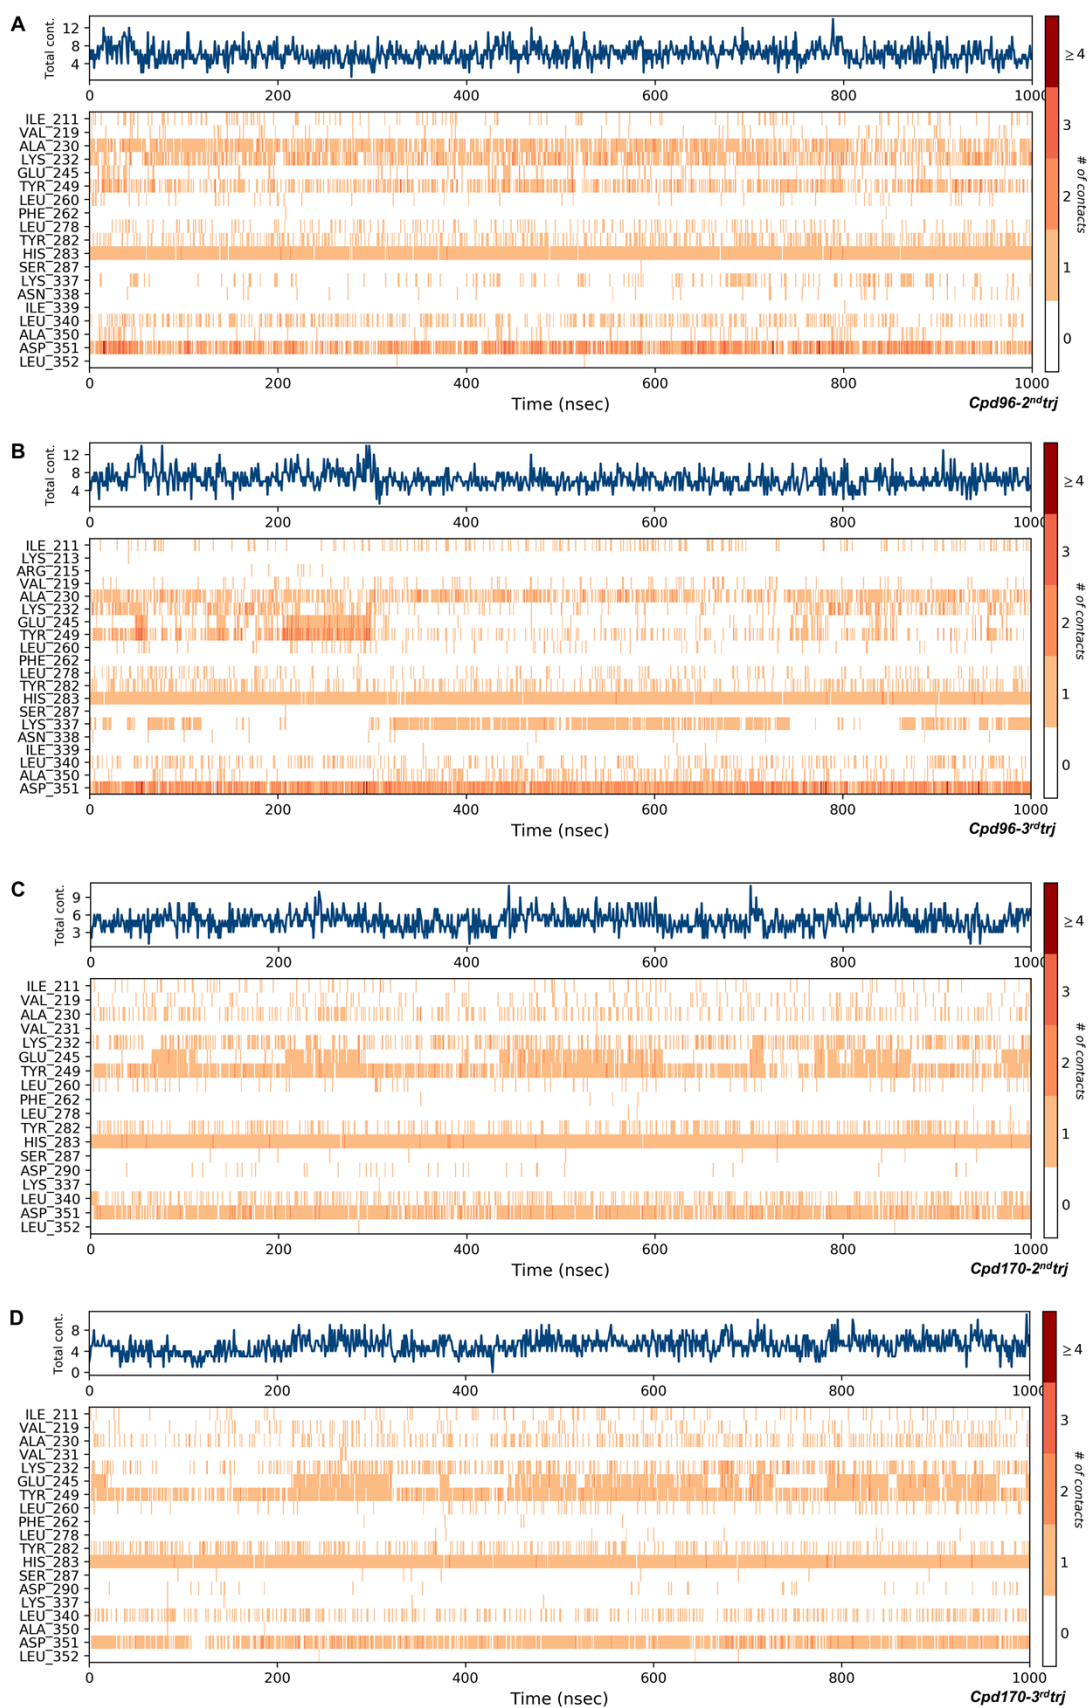

Figure S6. Non-covalent contacts between the protein and ligand monitored throughout the MD simulations (Cpd96 & Cpd170).



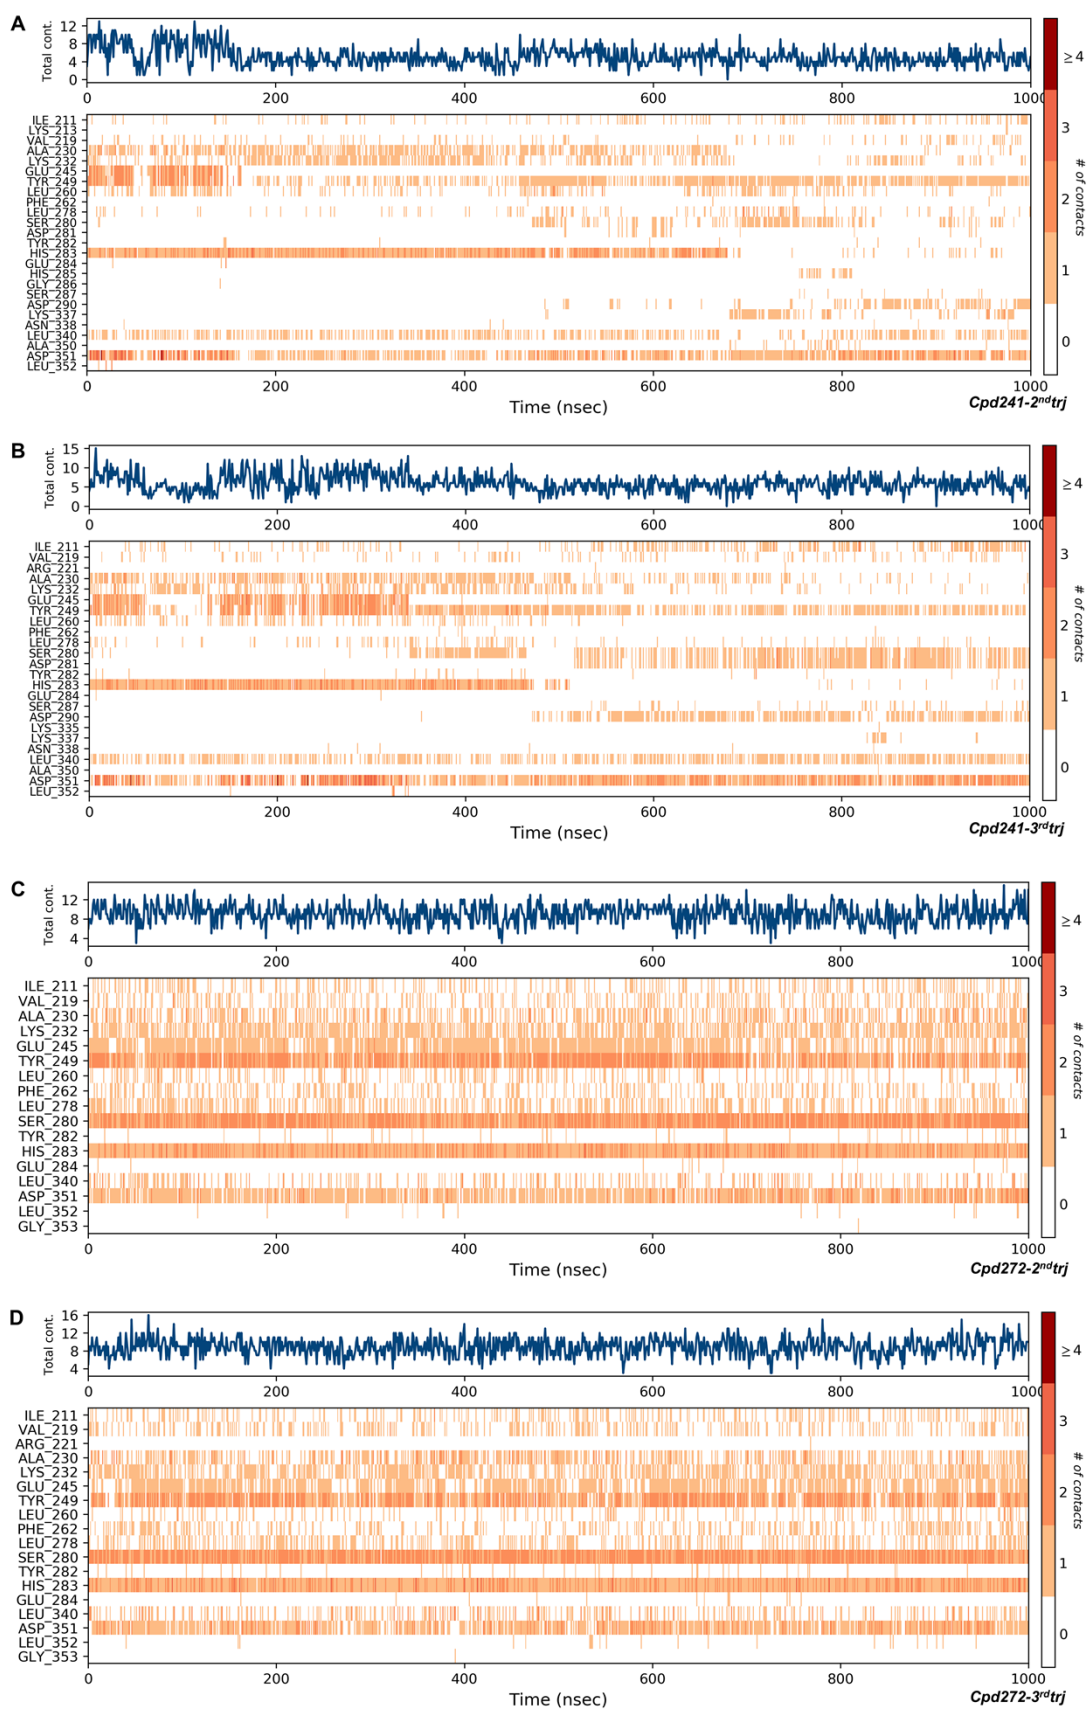

Figure S7. Non-covalent contacts between the protein and ligand monitored throughout the MD simulations (*Cpd241* & *Cpd272*).



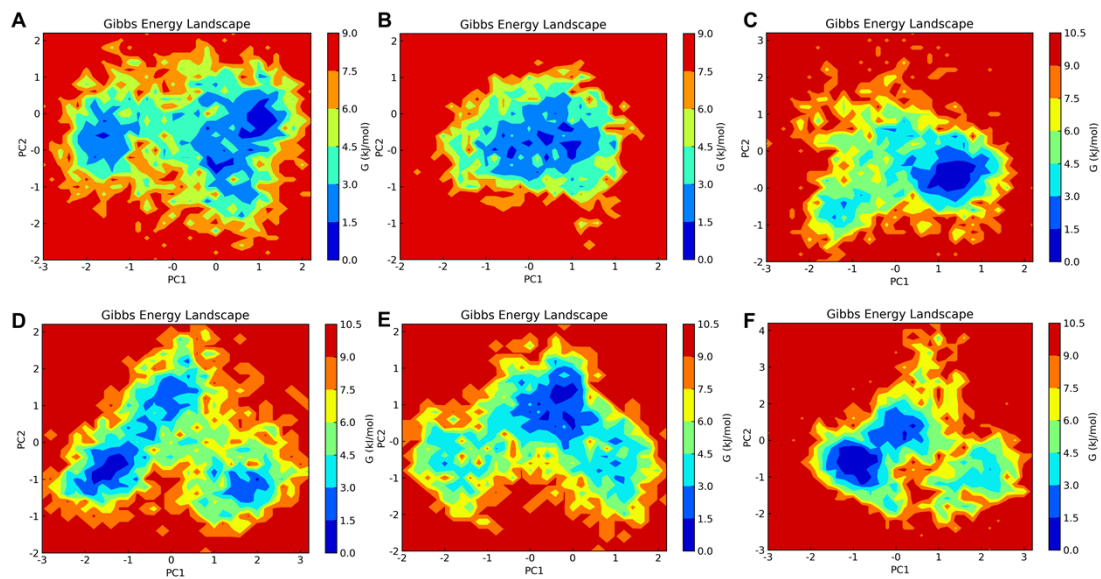

Figure S8. 2D free energy contour maps along the first two principal components (PCs) 1 and 2 for TGFβR1-apo (A), TGFβR1-coligand (B), TGFβR1-cpd96 (C), TGFβR1-cpd170 (D), TGFβR1-cpd241 (E), and TGFβR1-cpd272 (F).

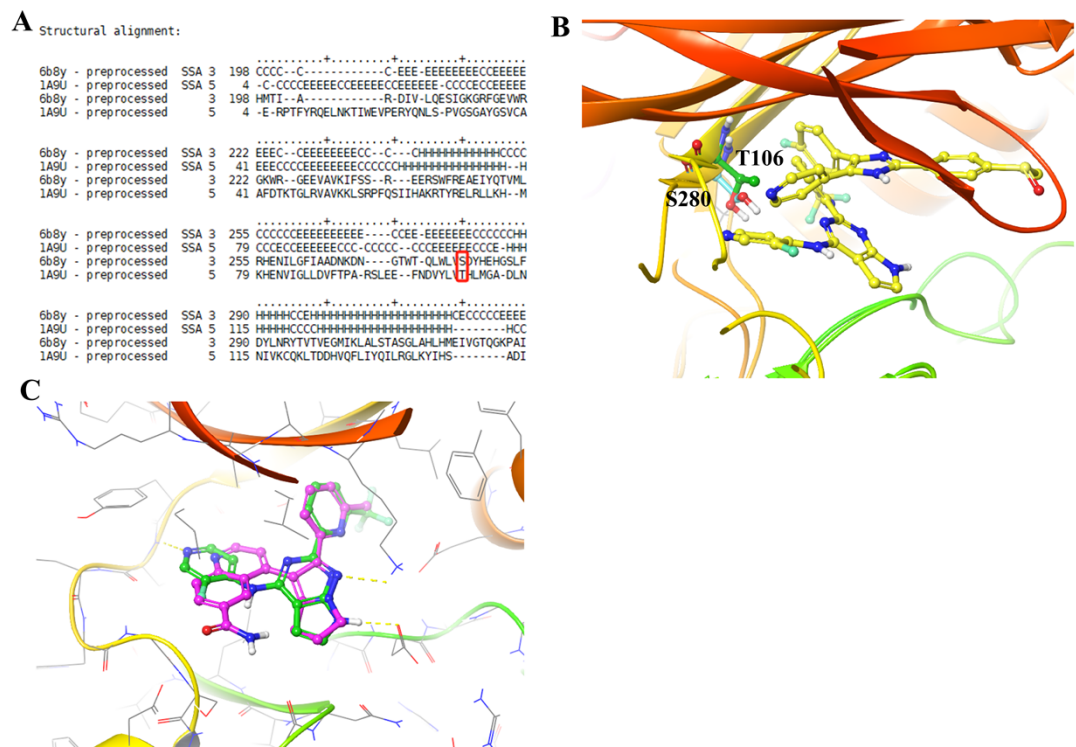

Figure S9. (A) Alignment of the crystal structure of TGF $\beta$ R1 (PDB id 6B8Y) with that of p38 $\alpha$  (PDB id 1A9U). (B) S280 in the crystal structure of TGF $\beta$ R1 and T106 at the corresponding position in the crystal structure of p38 $\alpha$  indicated in cyan and green, respectively. (C) Alignment of the docked pose of LY2157299 (magenta) with the co-crystal structure of 6B8Y (green).

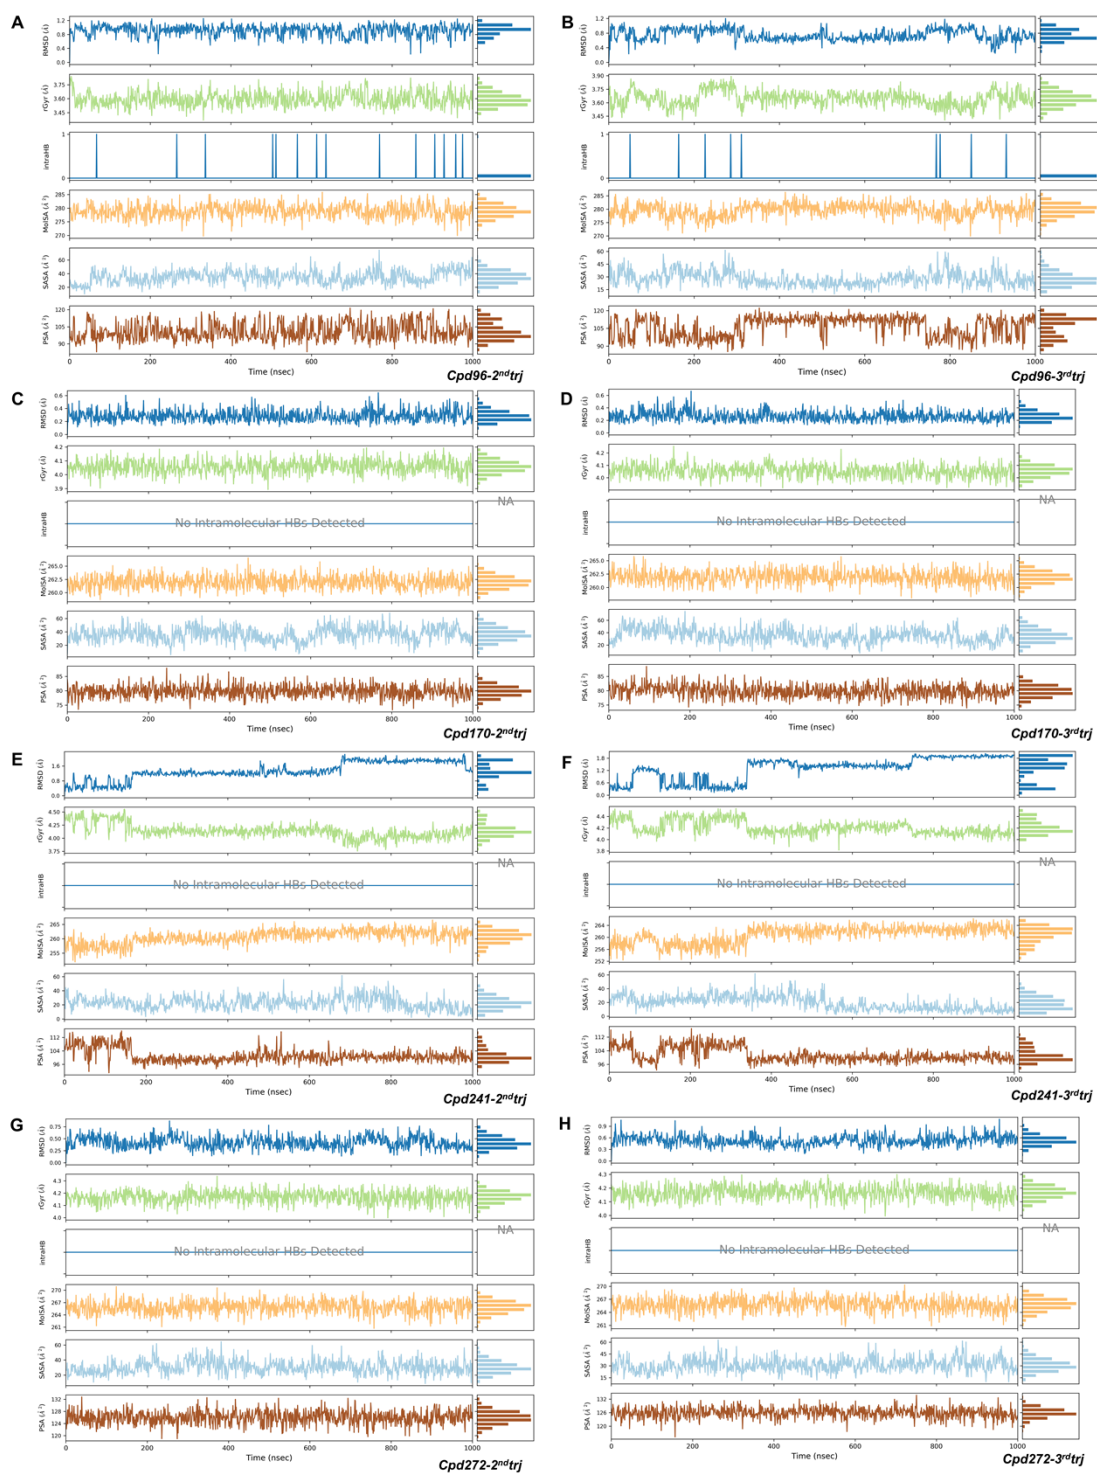

Figure S10. The properties of Cpd96 (A&B), Cpd170 (C&D), Cpd241 (E&F), and Cpd272 (G&H) monitored during the MD simulations.

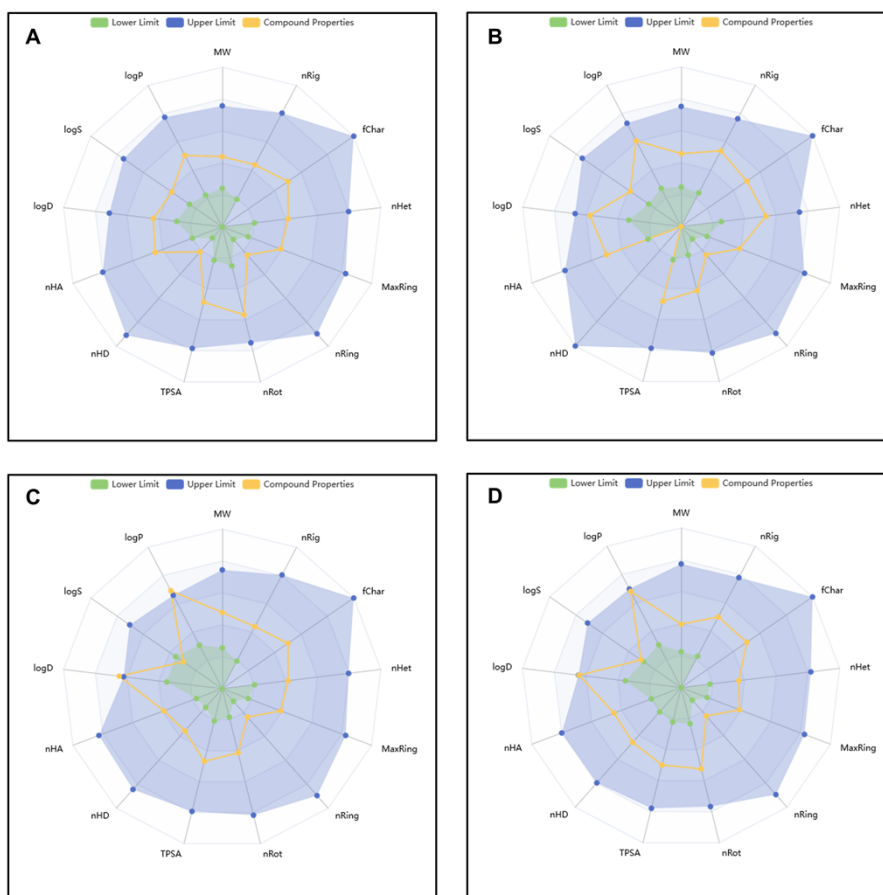

Figure S11. Physicochemical properties of **Cpd96** (A), **Cpd170** (B), **Cpd241** (C), and **Cpd272** (D).

Table S1. The XP Glide docking score, Prime MMGBSA binding free energies, Metadynamics Binding PersScore and PoseScore of the 80 promising compounds.

| ScreenID          | Name                                                                   | XP Glide Docking Score | Prime MMGBSA $\Delta G_{binding}$ (kcal/mol) | Metadynamics Binding PersScore <sup>a</sup> | Metadynamics Binding PoseScore <sup>b</sup> |
|-------------------|------------------------------------------------------------------------|------------------------|----------------------------------------------|---------------------------------------------|---------------------------------------------|
| Chembridge:680279 | -                                                                      | -10.769                | -65.9                                        | 0.404                                       | 1.628                                       |
| ChemDiv:644201    | N-benzyl-1-(2-furoyl)-3-pyridin-3-yl-1H-1,2,4-triazol-5-amine          | -11.463                | -63.99                                       | 0.495                                       | 1.721                                       |
| ChemDiv:644178    | 1-(2-furoyl)-N-(2-furylmethyl)-3-pyridin-3-yl-1H-1,2,4-triazol-5-amine | -10.476                | -63.28                                       | 0.434                                       | 1.272                                       |
| Enamine:3519141   | Compound241                                                            | -10.217                | -63.27                                       | 0.076                                       | 0.979                                       |

|                    |                                                                                 |         |        |       |       |
|--------------------|---------------------------------------------------------------------------------|---------|--------|-------|-------|
| ChemDiv:644178     | 1-(2-furoyl)-N-(2-furylmethyl)-3-pyridin-3-yl-1H-1,2,4-triazol-5-amine          | -10.9   | -63.19 | 0.364 | 2.067 |
| ChemDiv:644152     | 1-(2-furoyl)-3-pyridin-3-yl-N-(thien-2-ylmethyl)-1H-1,2,4-triazol-5-amine       | -10.548 | -62.09 | 0.505 | 1.403 |
| Enamine:621869     | Compound272                                                                     | -9.53   | -62.09 | 0.848 | 0.686 |
| Chembridge:678291  | -                                                                               | -10.554 | -62.07 | 0.455 | 1.694 |
| ChemDiv:644247     | N-(4-fluorobenzyl)-1-(2-furoyl)-3-pyridin-3-yl-1H-1,2,4-triazol-5-amine         | -11.58  | -61.84 | 0.313 | 2.237 |
| ChemDiv:403179     | N-/4,6-di(1H-imidazol-1-yl)-1,3,5-triazin-2-yl/-N-methyl-N-phenylamine          | -10.712 | -60.66 | 0.621 | 1.045 |
| Vitas-m:122996     | -                                                                               | -10.623 | -60.64 | 0.727 | 0.771 |
| ChemDiv:644167     | N-(2-furylmethyl)-1-propionyl-3-pyridin-3-yl-1H-1,2,4-triazol-5-amine           | -9.733  | -60.52 | 0.742 | 0.902 |
| Enamine:3505736    | Compound170                                                                     | -10.347 | -59.1  | 1     | 0.933 |
| ChemDiv:644166     | 1-acetyl-N-(2-furylmethyl)-3-pyridin-3-yl-1H-1,2,4-triazol-5-amine              | -9.748  | -59.12 | 0.712 | 0.964 |
| Enamine:391660     | Compound96                                                                      | -10.041 | -59.41 | 0.485 | 1.034 |
| Enamine:3579058    | Compound279                                                                     | -10.917 | -57.92 | 0.439 | 0.989 |
| Chembridge:678724  | -                                                                               | -9.544  | -59.13 | 0.409 | 1.161 |
| Chembridge:1809682 | -                                                                               | -9.571  | -58.83 | 0.455 | 1.559 |
| Chembridge:1647975 | -                                                                               | -9.39   | -58.02 | 0.348 | 1.214 |
| ChemDiv:644249     | N-(4-fluorobenzyl)-1-(3-methylbutanoyl)-3-pyridin-3-yl-1H-1,2,4-triazol-5-amine | -11.432 | -57.99 | 0.293 | 1.976 |
| Enamine:676033     | Compound283                                                                     | -9.94   | -56.44 | 0.939 | 1.349 |
| Chembridge:2553615 | -                                                                               | -9.402  | -56.54 | 0.788 | 0.743 |
| Enamine:3699359    | Compound60                                                                      | -9.217  | -56.49 | 0.848 | 1.074 |
| ChemDiv:644138     | 1-acetyl-3-pyridin-3-yl-N-(thien-2-ylmethyl)-1H-1,2,4-triazol-5-amine           | -9.475  | -56.98 | 0.636 | 1.196 |
| Chembridge:681123  | -                                                                               | -9.47   | -57    | 0.545 | 1.122 |
| Enamine:3504250    | Compound306                                                                     | -10.27  | -57.74 | 0.47  | 1.306 |
| Chembridge:867615  | -                                                                               | -9.375  | -57.84 | 0.444 | 1.323 |
| Enamine:2567468    | Compound112                                                                     | -9.309  | -56.77 | 0.364 | 0.937 |
| Enamine:3431977    | Compound203                                                                     | -9.795  | -57.8  | 0.323 | 1.713 |
| Enamine:3451714    | Compound42                                                                      | -9.069  | -57.14 | 0.076 | 1.497 |
| Chembridge:2700968 | -                                                                               | -11.886 | -55.57 | 0.833 | 0.866 |
| Enamine:199111     | Compound32                                                                      | -10.167 | -55.99 | 0.545 | 1.263 |
| ChemDiv:644190     | N-benzyl-1-(methoxyacetyl)-3-pyridin-3-yl-1H-1,2,4-triazol-5-amine              | -10.202 | -55.81 | 0.455 | 1.216 |
| Chembridge:1730002 | -                                                                               | -9.306  | -55.79 | 0.434 | 1.219 |
| Chembridge:2128071 | -                                                                               | -9.594  | -56.33 | 0.343 | 0.77  |
| ChemDiv:644142     | 1-(methoxyacetyl)-3-pyridin-3-yl-N-(thien-2-ylmethyl)-1H-1,2,4-triazol-5-amine  | -9.567  | -55.21 | 0.515 | 1.744 |
| Chembridge:680279  | -                                                                               | -10.23  | -55.73 | 0.47  | 1.82  |
| ChemDiv:644234     | N-(4-fluorobenzyl)-1-propionyl-3-pyridin-3-yl-1H-1,2,4-triazol-5-amine          | -10.645 | -55.67 | 0.439 | 1.789 |
| Enamine:3589009    | Compound283                                                                     | -9.423  | -56.28 | 0.258 | 1.64  |
| Enamine:3823638    | Compound140                                                                     | -8.997  | -55.99 | 0.172 | 2.211 |
| ChemDiv:1401960    | N~5~-(2-furylmethyl)-4-methyl-2-(3-pyridyl)-1,3-thiazole-5-carboxamide          | -10.211 | -54.61 | 0.864 | 0.705 |

|                     |                                                                              |         |        |       |       |
|---------------------|------------------------------------------------------------------------------|---------|--------|-------|-------|
| Chembridge:801078   | -                                                                            | -10.151 | -54.89 | 0.758 | 1.203 |
| Chembridge:1869990  | -                                                                            | -10.054 | -55.29 | 0.657 | 1.055 |
| Chembridge:1647975  | -                                                                            | -10.218 | -54.63 | 0.621 | 0.93  |
| Enamine:3656534     | Compound115                                                                  | -9.026  | -54.78 | 0.515 | 0.926 |
| ChemDiv:644167      | N-(2-furylmethyl)-1-propionyl-3-pyridin-3-yl-1H-1,2,4-triazol-5-amine        | -9.527  | -54.81 | 0.576 | 1.37  |
| Enamine:3171976     | Compound286                                                                  | -9.517  | -54.61 | 0.424 | 0.882 |
| ChemDiv:644234      | N-(4-fluorobenzyl)-1-propionyl-3-pyridin-3-yl-1H-1,2,4-triazol-5-amine       | -10.195 | -55.11 | 0.455 | 1.84  |
| Enamine:106811      | Compound29                                                                   | -10.015 | -54.9  | 0.03  | 0.717 |
| Enamine:1486779     | Compound15                                                                   | -9.393  | -55.09 | 0.061 | 1.77  |
| Enamine:2449962     | Compound273                                                                  | -9.616  | -54.28 | 0.909 | 0.852 |
| Enamine:3465910     | Compound132                                                                  | -10.785 | -54.54 | 0.848 | 0.826 |
| ChemDiv:856890      | N-(2-furylmethyl)-5-pyridin-3-ylisoxazole-3-carboxamide                      | -10.373 | -54.36 | 0.894 | 1.223 |
| Enamine:196657      | Compound12                                                                   | -10.02  | -54.2  | 0.742 | 0.79  |
| Lifechemical:404247 | F3348-0683                                                                   | -10.692 | -54.49 | 0.667 | 0.743 |
| ChemDiv:765946      | 5,6-dimethyl-3-phenyl-N-pyridin-4-ylpyrazolo/1,5-a/pyrimidin-7-amine         | -10.794 | -54.4  | 0.636 | 0.625 |
| Enamine:111214      | Compound172                                                                  | -9.885  | -54.25 | 0.636 | 0.818 |
| Chembridge:1942426  | -                                                                            | -11.602 | -54.52 | 0.727 | 1.676 |
| ChemDiv:644178      | 1-(2-furoyl)-N-(2-furylmethyl)-3-pyridin-3-yl-1H-1,2,4-triazol-5-amine       | -10.415 | -54.52 | 0.485 | 1.964 |
| Chembridge:2146342  | -                                                                            | -9.813  | -54.29 | 0.091 | 1.181 |
| Enamine:3380163     | Compound209                                                                  | -9.851  | -54.15 | 0.939 | 1.094 |
| ChemDiv:644168      | 1-butyryl-N-(2-furylmethyl)-3-pyridin-3-yl-1H-1,2,4-triazol-5-amine          | -10.14  | -54.11 | 0.758 | 1.463 |
| ChemDiv:644237      | N-(4-fluorobenzyl)-1-(methoxyacetyl)-3-pyridin-3-yl-1H-1,2,4-triazol-5-amine | -10.277 | -54.17 | 0.591 | 1.162 |
| Lifechemical:398096 | F3305-0285                                                                   | -10.656 | -54.13 | 0.318 | 0.643 |
| Chembridge:2275924  | -                                                                            | -9.41   | -54.19 | 0.288 | 0.674 |
| Enamine:1850292     | Compound94                                                                   | -9.812  | -54.11 | 0.379 | 2.253 |
| Chembridge:1910833  | -                                                                            | -8.905  | -54.2  | 0.167 | 1.236 |
| ChemDiv:765334      | 5-methyl-3-phenyl-N-pyridin-4-ylpyrazolo/1,5-a/pyrimidin-7-amine             | -10.643 | -54.12 | 0     | 0.575 |
| Lifechemical:398096 | F3305-0285                                                                   | -10.506 | -54.18 | 0     | 1.377 |
| Enamine:1850292     | Compound94                                                                   | -9.812  | -54.15 | 0.318 | 3.307 |
| Enamine:3329291     | Compound141                                                                  | -9.676  | -54    | 0.879 | 0.762 |
| Chembridge:2584925  | -                                                                            | -10.736 | -53.46 | 0.924 | 1.103 |
| Lifechemical:36906  | F6445-6296 F6445-6296                                                        | -9.447  | -53.9  | 0.53  | 0.607 |
| Lifechemical:36906  | F6445-6296 F6445-6296                                                        | -9.274  | -53.94 | 0.545 | 0.753 |
| Lifechemical:36906  | F6445-6296 F6445-6296                                                        | -9.261  | -54.09 | 0.47  | 0.601 |
| ChemDiv:644190      | N-benzyl-1-(methoxyacetyl)-3-pyridin-3-yl-1H-1,2,4-triazol-5-amine           | -10.005 | -53.53 | 0.636 | 1.632 |
| Chembridge:1942426  | -                                                                            | -11.263 | -53.95 | 0.561 | 1.714 |
| Enamine:3250881     | Compound101                                                                  | -9.524  | -53.34 | 0.242 | 0.625 |
| Vitas-m:68117       | -                                                                            | -9.183  | -53.65 | 0.015 | 1.7   |
| ChemDiv:2265865     | N-/2-(5-isopropyl-1,3,4-oxadiazol-2-yl)-3-thienyl/-3-thiophenecarboxamide    | -9.048  | -53.66 | 0     | 1.792 |



<sup>a</sup> PersScore  $\geq 0.6$ , hydrogen bonds were kept good persistence

<sup>b</sup> PoseScore  $\leq 2$ , binding pose of the compound was considered stable
